# Supplementary material for: Luminescent iridium(iii) 2-cyanobenzothiazole complexes as site-specific labels to afford peptide-based phosphorogenic probes and hydrogels for enzyme activity sensing, cancer imaging and photodynamic therapy
Source: Royal Society of Chemistry journal article supplement (doi:10.1039/d4qi03276d), 2025-01-01
Supplement: d4qi03276d1.pdf [file d4qi03276d1.pdf]

## Electronic Supplementary Information

### **Luminescent iridium(III) 2-cyanobenzothiazole complexes as site-specific labels to afford peptide-based phosphorogenic probes and hydrogels for enzyme activity sensing, cancer imaging and photodynamic therapy**

Jun-Wen Xu,<sup>a</sup> Lawrence Cho-Cheung Lee,<sup>a</sup> Alex Man-Hei Yip,<sup>a,b</sup> Guang-Xi Xu,<sup>a</sup> Peter Kam-Keung Leung<sup>a,c</sup> and Kenneth Kam-Wing Lo<sup>\*a,c</sup>

<sup>a</sup> Department of Chemistry, City University of Hong Kong, Tat Chee Avenue, Kowloon, Hong Kong, P. R. China; Email: bhkenlo@cityu.edu.hk

<sup>b</sup> Laboratory for Synthetic Chemistry and Chemical Biology Limited, Units 1503–1511, 15/F, Building 17 W, Hong Kong Science Park, New Territories, Hong Kong, P. R. China

<sup>c</sup> State Key Laboratory of Terahertz and Millimetre Waves, City University of Hong Kong, Tat Chee Avenue, Kowloon, Hong Kong, P. R. China

## Table of Contents

|                 |                                                                                                                                                                                                                                                                                   |     |
|-----------------|-----------------------------------------------------------------------------------------------------------------------------------------------------------------------------------------------------------------------------------------------------------------------------------|-----|
| <b>Table S1</b> | Electronic absorption spectral data of complexes <b>1 – 3</b> at 298 K.                                                                                                                                                                                                           | S6  |
| <b>Table S2</b> | Singlet oxygen ( $^1\text{O}_2$ ) generation quantum yields ( $\Phi_\Delta$ ) of complexes <b>1 – 3</b> and conjugates <b>2-MMP</b> and <b>2-MMP-QSY7</b> in aerated $\text{CH}_3\text{CN}$ at 298 K.                                                                             | S7  |
| <b>Table S3</b> | Photophysical data of conjugates <b>2-MMP</b> , <b>2-MMP-QSY7</b> and <b>2-VPMS</b> at 298 K.                                                                                                                                                                                     | S8  |
| <b>Table S4</b> | Förster resonance energy transfer (FRET) parameters of conjugate <b>2-MMP-QSY7</b> .                                                                                                                                                                                              | S9  |
| <b>Table S5</b> | (Photo)cytotoxicity ( $\text{IC}_{50}$ ) of conjugate <b>2-MMP-QSY7</b> towards MDA-MB-231 and HEK-293 cells. Photocytotoxicity index (PI) = $\text{IC}_{50,\text{drak}}/\text{IC}_{50,\text{light}}$ .                                                                           | S10 |
| <b>Table S6</b> | Cellular uptake of conjugate <b>2-MMP-QSY7</b> .                                                                                                                                                                                                                                  | S11 |
| <b>Fig. S1</b>  | Electronic absorption spectra of complexes <b>1 – 3</b> in $\text{CH}_2\text{Cl}_2$ (black) and $\text{CH}_3\text{CN}$ (red) at 298 K.                                                                                                                                            | S12 |
| <b>Fig. S2</b>  | Normalised emission spectra of complexes <b>1 – 3</b> in degassed $\text{CH}_2\text{Cl}_2$ (black) and $\text{CH}_3\text{CN}$ (red) at 298 K and in alcohol glass at 77 K (blue) ( $\lambda_{\text{ex}} = 350 \text{ nm}$ ).                                                      | S13 |
| <b>Fig. S3</b>  | HPLC chromatograms ( $\lambda_{\text{abs}} = 350 \text{ nm}$ ) of complexes <b>1 – 3</b> (100 $\mu\text{M}$ ) (black) and the reaction mixtures of complexes <b>1 – 3</b> (100 $\mu\text{M}$ ) and L-cysteine (L-Cys) (250 $\mu\text{M}$ ) in phosphate-buffered saline (PBS) (pH | S14 |

7.4)/CH<sub>3</sub>CN (9:1, v/v) containing tris(2-carboxyethyl) phosphine (TCEP) (100 μM) after incubation at 298 K for 4 h (red).

- Fig. S4** ESI mass spectra of the eluent collected at  $t_R = 20.2$  min (**1-Cys**), 18.2 min (**2-Cys**) and 20.9 min (**3-Cys**). S15
- Fig. S5** ESI mass spectra of a mixture of complex **2** (100 μM) and glutathione (250 μM), histidine (250 μM), lysine (250 μM), serine (250 μM), or threonine (250 μM) in PBS (pH 7.4)/CH<sub>3</sub>CN (9:1, v/v) after incubation at 37°C for 12 h. S16
- Fig. S6** HPLC chromatograms ( $\lambda_{abs} = 350$  nm) of conjugates **2-MMP** ( $t_R = 15.56$  min), **2-MMP-QSY7** ( $t_R = 15.83$  min) and **2-VPMS** ( $t_R = 14.12$  min). S17
- Fig. S7** ESI mass spectra of purified conjugates **2-MMP**, **2-MMP-QSY7** and **2-VPMS** in CH<sub>3</sub>OH at 298 K. S18
- Fig. S8** Spectral overlap of the absorption spectrum of the acceptor QSY-7 (black) and normalised emission spectrum of the donor conjugate **2-MMP** (red) in H<sub>2</sub>O/CH<sub>3</sub>CN (1:1, v/v) at 298 K. S19
- Fig. S9** HPLC chromatograms ( $\lambda_{abs} = 350$  and 560 nm) of (a) conjugate **2-MMP-QSY7** (5 μM) before (black) and after (red) incubation with matrix metalloproteinase (MMP)-2 (0.002 mg mL<sup>-1</sup> in PBS) in aerated MMP reaction buffer/DMSO (99:1, v/v) at 37°C for 12 h. ESI mass spectra of cleavage products (b) **2-CVPMS** and (c) MRGGK-QSY7. S20
- Fig. S10** (a) SEM image and (b) EDS images and spectrum of **Gel-1**. Scale bar = 100 μm. S21

|                 |                                                                                                                                                                                                                                                                                                                                                                                                                                               |     |
|-----------------|-----------------------------------------------------------------------------------------------------------------------------------------------------------------------------------------------------------------------------------------------------------------------------------------------------------------------------------------------------------------------------------------------------------------------------------------------|-----|
| <b>Fig. S11</b> | Photographs of (a) <b>Gel-1</b> ([Ir] = 80 $\mu$ M, 100 $\mu$ L) and (b) <b>Gel-2</b> ([Ir] = 40 $\mu$ M, 100 $\mu$ L) upon addition of Dulbecco's Modified Eagle Medium (DMEM) (150 $\mu$ L) and incubation for 24, 48 and 72 h.                                                                                                                                                                                                             | S22 |
| <b>Fig. S12</b> | Optical microscopy images of MDA-MB-231 cells encapsulated by <b>Gel-1</b> ([Ir] = 40 $\mu$ M, 100 $\mu$ L) at different focal lengths.                                                                                                                                                                                                                                                                                                       | S23 |
| <b>Fig. S13</b> | Analysis of live/dead MDA-MB-231 and HEK-293 cells using Calcein-AM (1 $\mu$ M, 30 min; $\lambda_{\text{ex}}$ = 488 nm, $\lambda_{\text{em}}$ = 510 – 540 nm) and propidium iodide (PI) (3 $\mu$ M, 30 min; $\lambda_{\text{ex}}$ = 532 nm, $\lambda_{\text{em}}$ = 610 – 640 nm). The cells were encapsulated by <b>Gel-1</b> ([Ir] = 40 $\mu$ M) for 72 h. Scale bar = 100 $\mu$ m.                                                         | S24 |
| <b>Fig. S14</b> | Laser-scanning confocal microscopy (LSCM) images of MDA-MB-231 cells encapsulated by <b>Gel-1</b> ([Ir] = 40 $\mu$ M; $\lambda_{\text{ex}}$ = 405 nm, $\lambda_{\text{em}}$ = 570 – 620 nm) at 0, 6 and 18 h at 37°C. Scale bar = 20 $\mu$ m.                                                                                                                                                                                                 | S25 |
| <b>Fig. S15</b> | (a) SEM image and (b) EDS images and spectrum of <b>Gel-2</b> . Scale bar = 100 $\mu$ m.                                                                                                                                                                                                                                                                                                                                                      | S26 |
| <b>Fig. S16</b> | Intracellular reactive oxygen species (ROS) levels of <b>Gel-2</b> ([Ir] = 80 $\mu$ M, 24 h)-pretreated MDA-MB-231 cells incubated with chloromethyl-2',7'-dichlorodihydrofluorescein diacetate (CM-H <sub>2</sub> DCFDA) (10 $\mu$ M, 30 min; $\lambda_{\text{ex}}$ = 488 nm, $\lambda_{\text{em}}$ = 500 – 550 nm) without (left) or with (right) photoirradiation at 450 nm (15 mW cm <sup>-2</sup> ) for 30 min. Scale bar = 100 $\mu$ m. | S27 |
| <b>Fig. S17</b> | <sup>1</sup> H NMR spectrum of the ligand bpy-CBT in (CD <sub>3</sub> ) <sub>2</sub> SO at 298 K.                                                                                                                                                                                                                                                                                                                                             | S28 |
| <b>Fig. S18</b> | <sup>1</sup> H NMR spectrum of complex <b>1</b> in (CD <sub>3</sub> ) <sub>2</sub> CO at 298 K.                                                                                                                                                                                                                                                                                                                                               | S29 |

|                  |                                                                                          |     |
|------------------|------------------------------------------------------------------------------------------|-----|
| <b>Fig. S19</b>  | $^{13}\text{C}$ NMR spectrum of complex <b>1</b> in $(\text{CD}_3)_2\text{SO}$ at 298 K. | S30 |
| <b>Fig. S20</b>  | HR-ESI mass spectrum of complex <b>1</b> in $\text{CH}_3\text{OH}$ at 298 K.             | S31 |
| <b>Fig. S21</b>  | $^1\text{H}$ NMR spectrum of complex <b>2</b> in $(\text{CD}_3)_2\text{CO}$ at 298 K.    | S32 |
| <b>Fig. S22</b>  | $^{13}\text{C}$ NMR spectrum of complex <b>2</b> in $(\text{CD}_3)_2\text{SO}$ at 298 K. | S33 |
| <b>Fig. S23</b>  | HR-ESI mass spectrum of complex <b>2</b> in $\text{CH}_3\text{OH}$ at 298 K.             | S34 |
| <b>Fig. S24</b>  | $^1\text{H}$ NMR spectrum of complex <b>3</b> in $(\text{CD}_3)_2\text{CO}$ at 298 K.    | S35 |
| <b>Fig. S25</b>  | $^{13}\text{C}$ NMR spectrum of complex <b>3</b> in $(\text{CD}_3)_2\text{SO}$ at 298 K. | S36 |
| <b>Fig. S26</b>  | HR-ESI mass spectrum of complex <b>3</b> in $\text{CH}_3\text{OH}$ at 298 K.             | S37 |
| <b>Reference</b> |                                                                                          | S38 |

**Table S1** Electronic absorption spectral data of complexes **1** – **3** at 298 K.

| Complex  | Solvent                         | $\lambda_{\text{abs}}/\text{nm}$ ( $\epsilon/\text{dm}^3 \text{ mol}^{-1} \text{ cm}^{-1}$ ) |
|----------|---------------------------------|----------------------------------------------------------------------------------------------|
| <b>1</b> | CH <sub>2</sub> Cl <sub>2</sub> | 256 sh (48,300), 309 (43,000), 364 sh (7,550)                                                |
|          | CH <sub>3</sub> CN              | 259 sh (37,130), 308 (27,000), 360 sh (4,590)                                                |
| <b>2</b> | CH <sub>2</sub> Cl <sub>2</sub> | 258 (67,070), 308 (46,005), 385 sh (7,655), 417 sh (3,560)                                   |
|          | CH <sub>3</sub> CN              | 257 (63,425), 309 (42,925), 379 sh (7,355), 414 sh (3,750)                                   |
| <b>3</b> | CH <sub>2</sub> Cl <sub>2</sub> | 261 (59,325), 293 (63,290), 349 (28,125), 370 sh (27,490), 472 sh (4,920)                    |
|          | CH <sub>3</sub> CN              | 261 (53,550), 291 (53,110), 346 (25,075), 366 sh (23,275), 475 sh (3,920)                    |

**Table S2** Singlet oxygen ( $^1\text{O}_2$ ) generation quantum yields ( $\Phi_\Delta$ ) of complexes **1** – **3** and conjugates **2-MMP** and **2-MMP-QSY7** in aerated  $\text{CH}_3\text{CN}$  at 298 K.

| Complex/Conjugate | $\Phi_\Delta^a$ |
|-------------------|-----------------|
| <b>1</b>          | 0.85            |
| <b>2</b>          | 0.59            |
| <b>3</b>          | 0.66            |
| <b>2-MMP</b>      | 0.52            |
| <b>2-MMP-QSY7</b> | 0.06            |

<sup>a</sup>  $[\text{Ru}(\text{bpy})_3]\text{Cl}_2$  was used ( $\Phi_\Delta = 0.57$  in aerated  $\text{CH}_3\text{CN}$ ,  $\lambda_{\text{ex}} = 450$  nm).

**Table S3** Photophysical data of conjugates **2-MMP**, **2-MMP-QSY7** and **2-VPMS** at 298 K.

| Conjugate         | Solvent                                          | $\lambda_{em}/nm^a$ | $\tau_0/\mu s^b$ | $\Phi_{em}^c$ |
|-------------------|--------------------------------------------------|---------------------|------------------|---------------|
| <b>2-MMP</b>      | H <sub>2</sub> O/CH <sub>3</sub> CN <sup>d</sup> | 608                 | 0.15             | 0.07          |
| <b>2-MMP-QSY7</b> | H <sub>2</sub> O/CH <sub>3</sub> CN <sup>d</sup> | 623                 | 0.13             | < 0.005       |
| <b>2-VPMS</b>     | H <sub>2</sub> O/CH <sub>3</sub> CN <sup>d</sup> | 590                 | 0.19             | 0.08          |

<sup>a</sup>  $\lambda_{ex} = 350$  nm.

<sup>b</sup> The lifetimes were measured at the emission maxima ( $\lambda_{ex} = 355$  nm).

<sup>c</sup> The emission quantum yields were determined using [Ru(bpy)<sub>3</sub>]Cl<sub>2</sub> ( $\Phi_{em} = 0.04$  in aerated H<sub>2</sub>O,  $\lambda_{ex} = 455$  nm) as a reference.<sup>1</sup>

<sup>d</sup> H<sub>2</sub>O/CH<sub>3</sub>CN (1:1, v/v).



**Table S4** Förster resonance energy transfer (FRET) parameters of conjugate **2-MMP-QSY7**.

| Donor        | Acceptor | $J(\lambda)/\text{nm}^4 \text{ M}^{-1} \text{ cm}^{-1a}$ | $R_0/\text{Å}$ | $D/\text{Å}^b$ | $E_{\text{calc}}$ | $E_{\text{expt}}$ |
|--------------|----------|----------------------------------------------------------|----------------|----------------|-------------------|-------------------|
| <b>2-MMP</b> | QSY-7    | $3.20 \times 10^{15}$                                    | 40.0           | 12.9           | 0.99              | 0.93              |

<sup>a</sup> Overlap integral of the emission spectrum of the QSY-7-free conjugate **2-MMP** and the absorption spectrum of QSY-7 (acceptor).

<sup>b</sup> Distance between the iridium(III) metal centre and centroid of QSY-7 in conjugate **2-MMP-QSY7**.

**Table S5** (Photo)cytotoxicity ( $IC_{50}$ ) of conjugate **2-MMP-QSY7** towards MDA-MB-231 and HEK-293 cells. Photocytotoxicity index (PI) =  $IC_{50,drak}/IC_{50,light}$ .

| Cell line  | $IC_{50,drak}/\mu M$ | $IC_{50,light}/\mu M$ | PI     |
|------------|----------------------|-----------------------|--------|
| MDA-MB-231 | > 40                 | $1.93 \pm 0.18$       | > 20.7 |
| HEK-293    | > 40                 | $10.17 \pm 0.86$      | > 3.9  |

**Table S6** Cellular uptake of conjugate **2-MMP-QSY7**.

| Conjugate         | Amount of iridium per cell/fmol <sup>a</sup> |              |
|-------------------|----------------------------------------------|--------------|
|                   | MDA-MB-231                                   | HEK-293      |
| <b>2-MMP-QSY7</b> | 0.38 ± 0.03                                  | 0.03 ± 0.004 |

<sup>a</sup> Amount of iridium associated with an average MDA-MB-231 or HEK-293 cell upon incubation with the conjugate (10 μM) at 37°C for 4 h, as determined by ICP-MS.

**Fig. S1** Electronic absorption spectra of complexes **1** – **3** in CH<sub>2</sub>Cl<sub>2</sub> (black) and CH<sub>3</sub>CN (red) at 298 K.

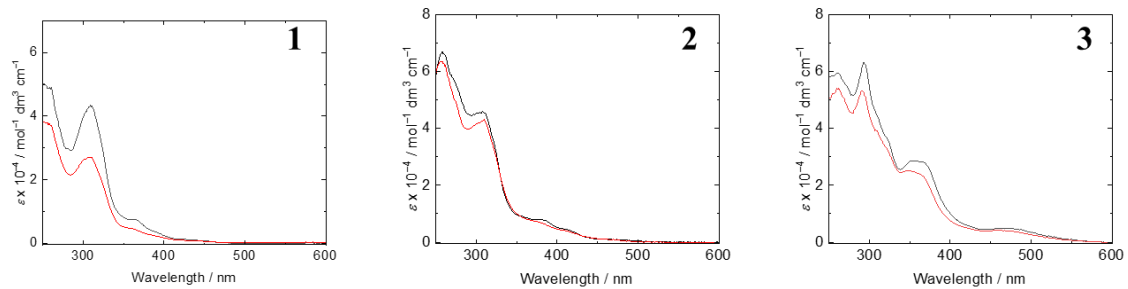

**Fig. S2** Normalised emission spectra of complexes **1** – **3** in degassed  $\text{CH}_2\text{Cl}_2$  (black) and  $\text{CH}_3\text{CN}$  (red) at 298 K and in alcohol glass at 77 K (blue) ( $\lambda_{\text{ex}} = 350$  nm).

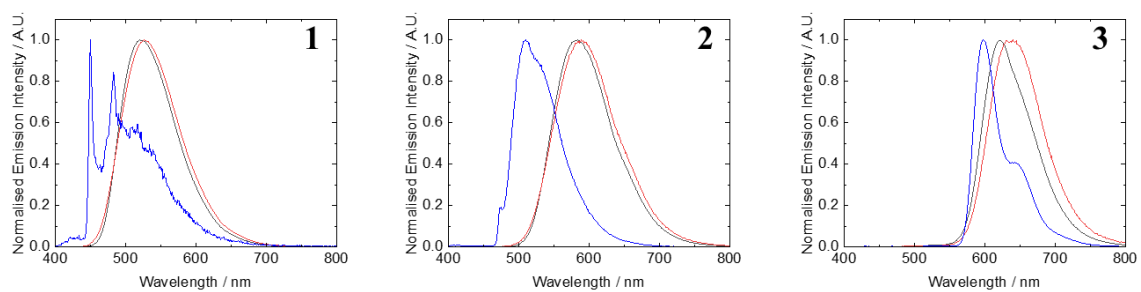

**Fig. S3** HPLC chromatograms ( $\lambda_{\text{abs}} = 350 \text{ nm}$ ) of complexes **1** – **3** (100  $\mu\text{M}$ ) (black) and the reaction mixtures of complexes **1** – **3** (100  $\mu\text{M}$ ) and L-cysteine (L-Cys) (250  $\mu\text{M}$ ) in phosphate-buffered saline (PBS) (pH 7.4)/CH<sub>3</sub>CN (9:1, v/v) containing tris(2-carboxyethyl) phosphine (TCEP) (100  $\mu\text{M}$ ) after incubation at 298 K for 4 h (red).

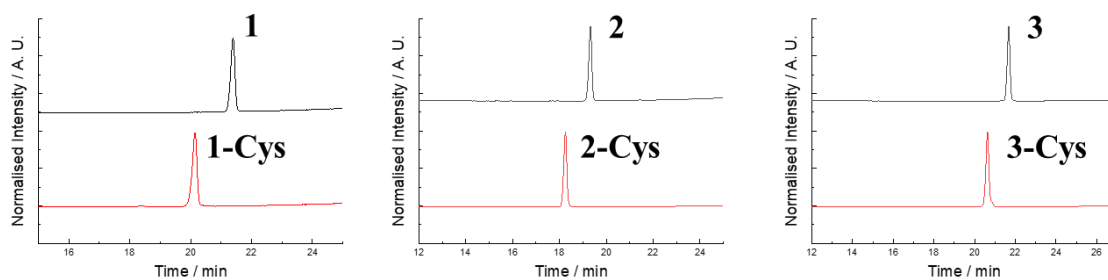

**Fig. S4** ESI mass spectra of the eluent collected at  $t_R = 20.2$  min (**1-Cys**), 18.2 min (**2-Cys**) and 20.9 min (**3-Cys**).

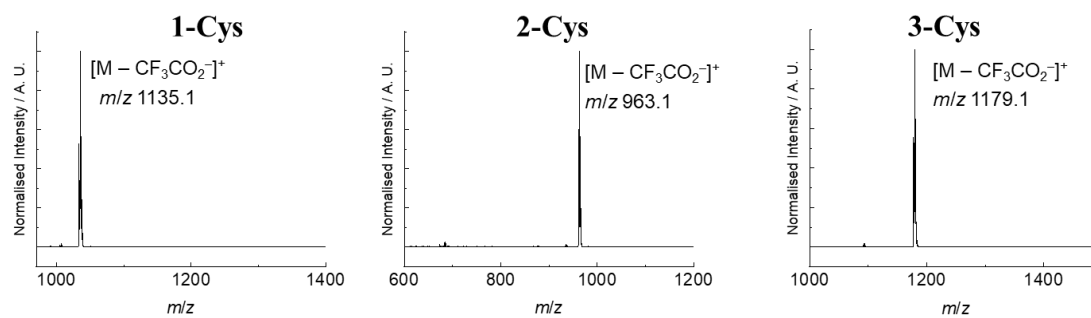

**Fig. S5** ESI mass spectra of a mixture of complex **2** (100  $\mu\text{M}$ ) and glutathione (250  $\mu\text{M}$ ), histidine (250  $\mu\text{M}$ ), lysine (250  $\mu\text{M}$ ), serine (250  $\mu\text{M}$ ), or threonine (250  $\mu\text{M}$ ) in PBS (pH 7.4)/CH<sub>3</sub>CN (9:1, v/v) after incubation at 37°C for 12 h.

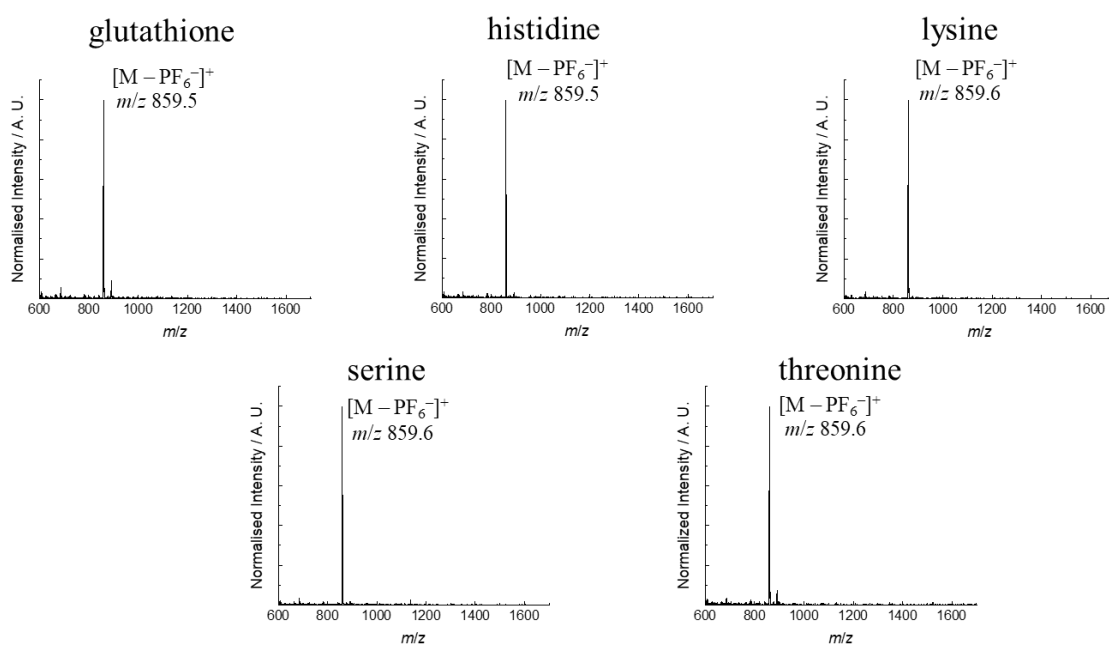



**Fig. S6** HPLC chromatograms ( $\lambda_{\text{abs}} = 350 \text{ nm}$ ) of conjugates **2-MMP** ( $t_{\text{R}} = 15.56 \text{ min}$ ), **2-MMP-QSY7** ( $t_{\text{R}} = 15.83 \text{ min}$ ) and **2-VPMS** ( $t_{\text{R}} = 14.12 \text{ min}$ ).

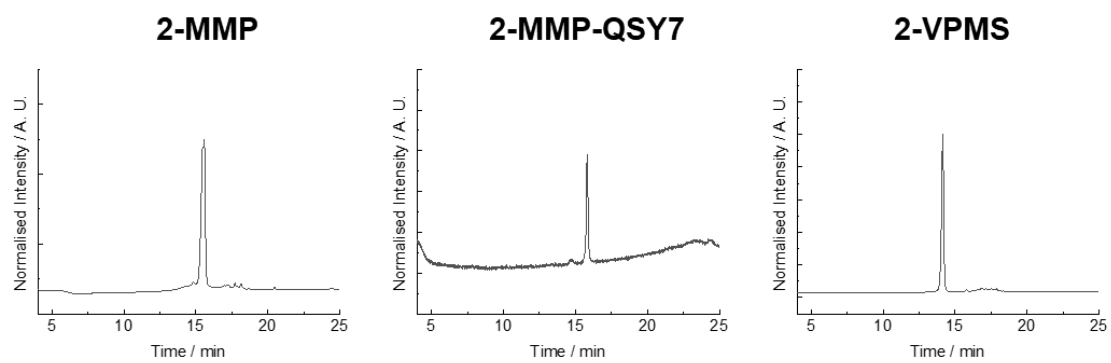

**Fig. S7** ESI mass spectra of purified conjugates **2-MMP**, **2-MMP-QSY7** and **2-VPMS** in CH<sub>3</sub>OH at 298 K.

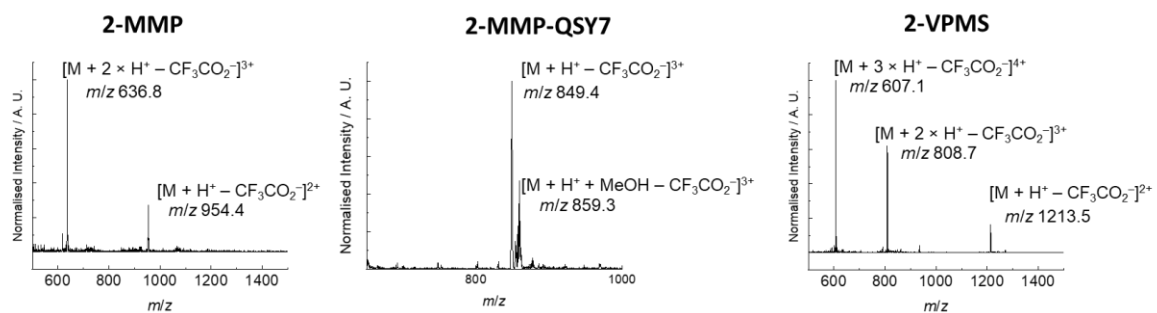

**Fig. S8** Spectral overlap of the absorption spectrum of the acceptor QSY-7 (black) and normalised emission spectrum of the donor conjugate **2-MMP** (red) in H<sub>2</sub>O/CH<sub>3</sub>CN (1:1, v/v) at 298 K.

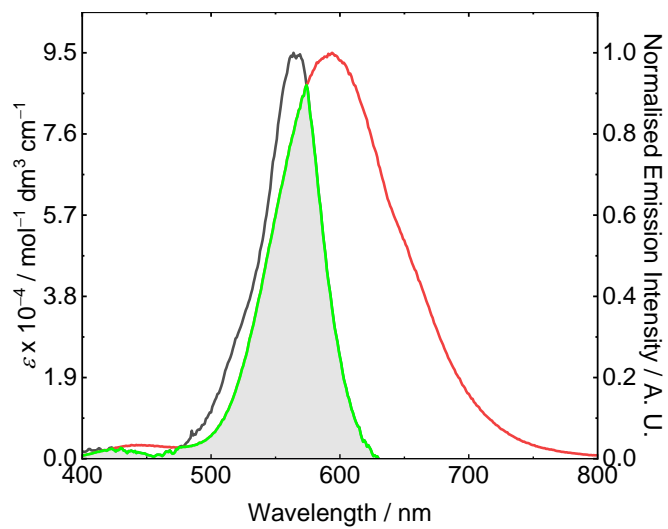

**Fig. S9** HPLC chromatograms ( $\lambda_{\text{abs}} = 350$  and  $560$  nm) of (a) conjugate **2-MMP-QSY7** ( $5 \mu\text{M}$ ) before (black) and after (red) incubation with matrix metalloproteinase (MMP)-2 ( $0.002 \text{ mg mL}^{-1}$  in PBS) in aerated MMP reaction buffer/DMSO ( $99:1, v/v$ ) at  $37^\circ\text{C}$  for  $12 \text{ h}$ . ESI mass spectra of cleavage products (b) **2-CVPMS** and (c) MRGGK-QSY7.

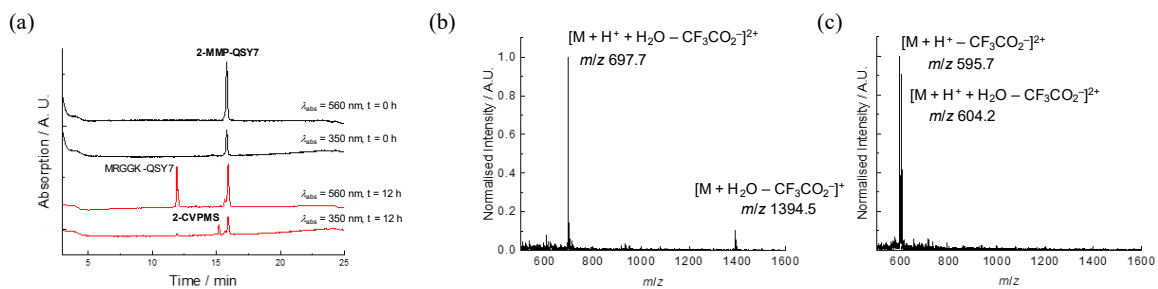

**Fig. S10** (a) SEM image and (b) EDS images and spectrum of **Gel-1**. Scale bar = 100  $\mu\text{m}$ .

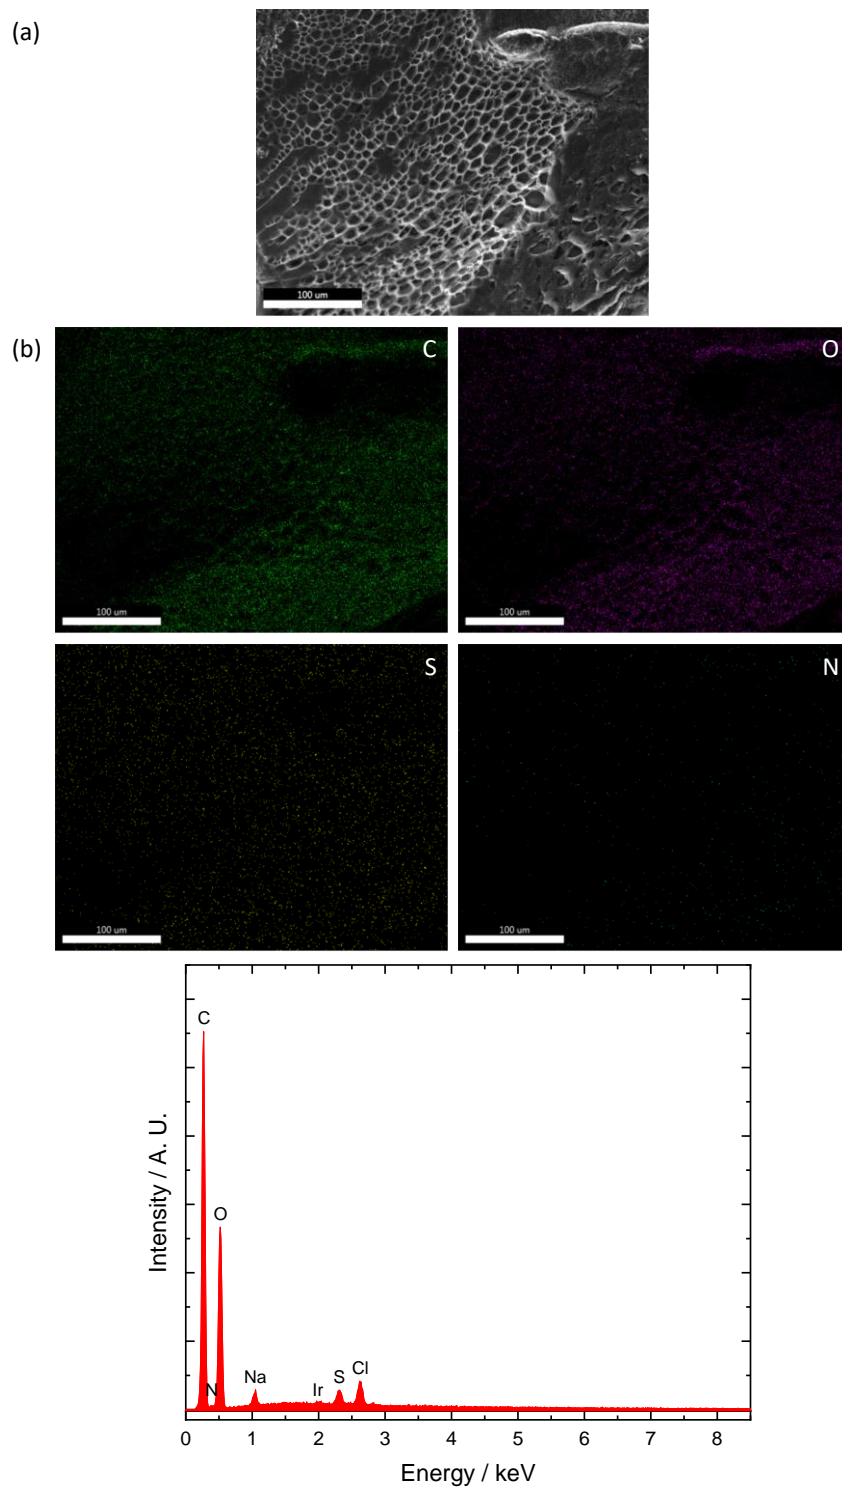

**Fig. S11** Photographs of (a) **Gel-1** ( $[Ir] = 80 \mu\text{M}$ ,  $100 \mu\text{L}$ ) and (b) **Gel-2** ( $[Ir] = 40 \mu\text{M}$ ,  $100 \mu\text{L}$ ) upon addition of Dulbecco's Modified Eagle Medium (DMEM) ( $150 \mu\text{L}$ ) and incubation for 24, 48 and 72 h.

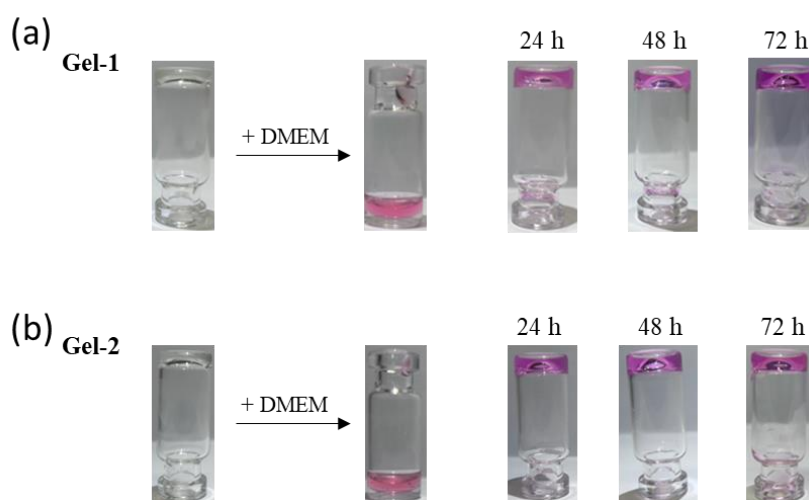

**Fig. S12** Optical microscopy images of MDA-MB-231 cells encapsulated by **Gel-1** ( $[Ir] = 40 \mu\text{M}$ ,  $100 \mu\text{L}$ ) at different focal lengths.

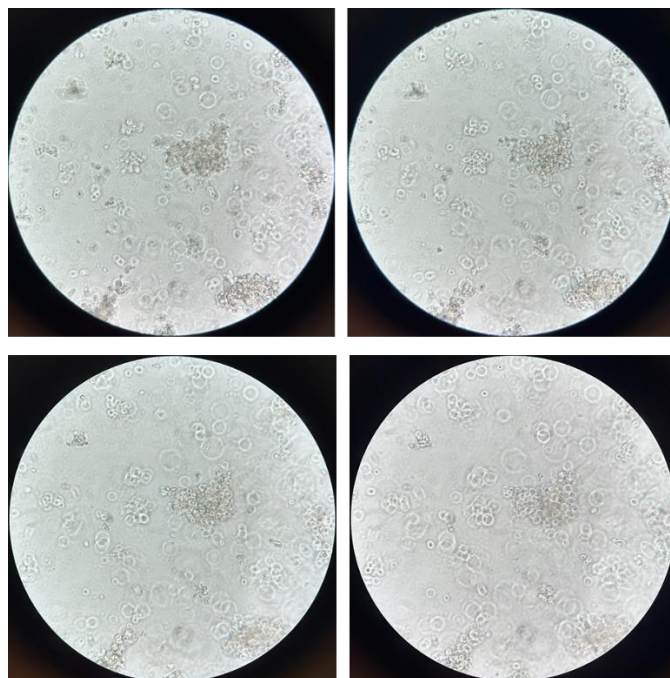

**Fig. S13** Analysis of live/dead MDA-MB-231 and HEK-293 cells using Calcein-AM (1  $\mu$ M, 30 min;  $\lambda_{\text{ex}}$  = 488 nm,  $\lambda_{\text{em}}$  = 510 – 540 nm) and propidium iodide (PI) (3  $\mu$ M, 30 min;  $\lambda_{\text{ex}}$  = 532 nm,  $\lambda_{\text{em}}$  = 610 – 640 nm). The cells were encapsulated by **Gel-1** ([Ir] = 40  $\mu$ M) for 72 h. Scale bar = 100  $\mu$ m.

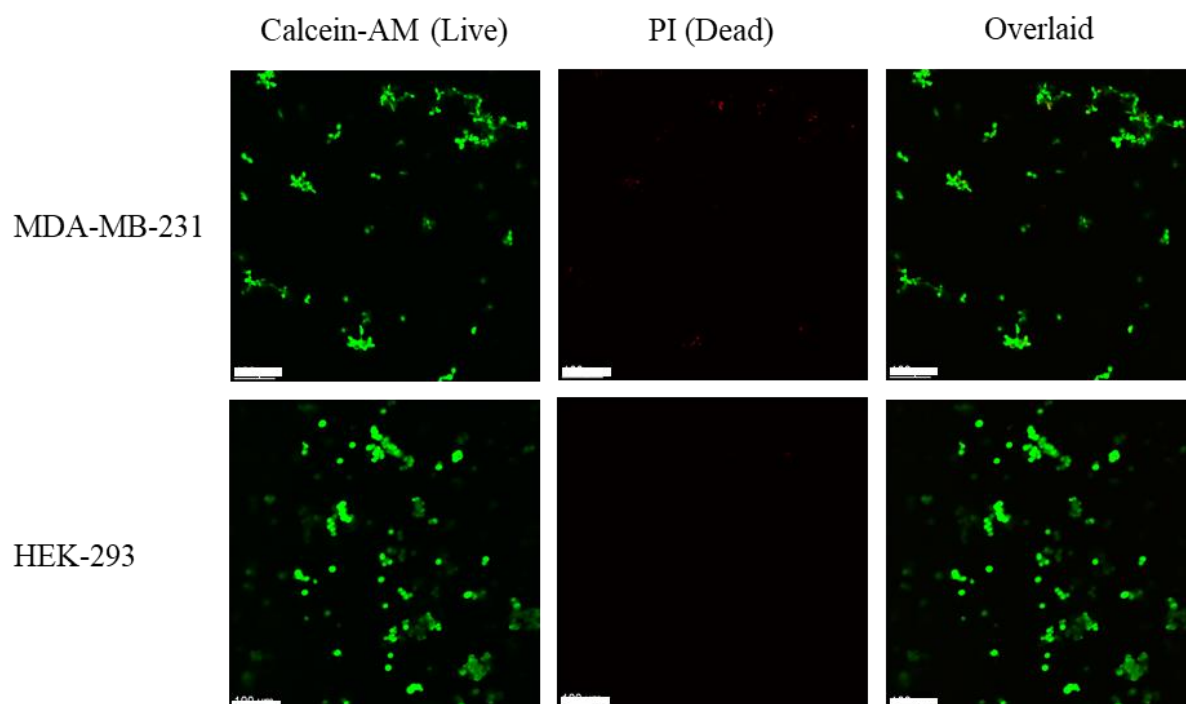



**Fig. S14** Laser-scanning confocal microscopy (LSCM) images of MDA-MB-231 cells encapsulated by **Gel-1** ( $[Ir] = 40 \mu\text{M}$ ;  $\lambda_{\text{ex}} = 405 \text{ nm}$ ,  $\lambda_{\text{em}} = 570 - 620 \text{ nm}$ ) at 0, 6 and 18 h at 37°C. Scale bar = 20  $\mu\text{m}$ .

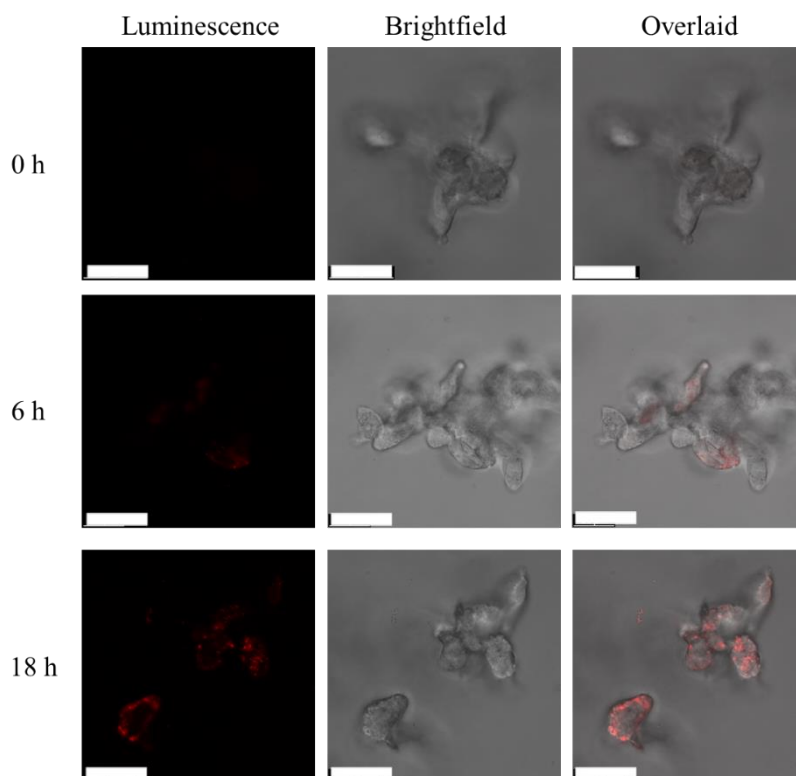

**Fig. S15** (a) SEM image and (b) EDS images and spectrum of **Gel-2**. Scale bar = 100  $\mu\text{m}$ .

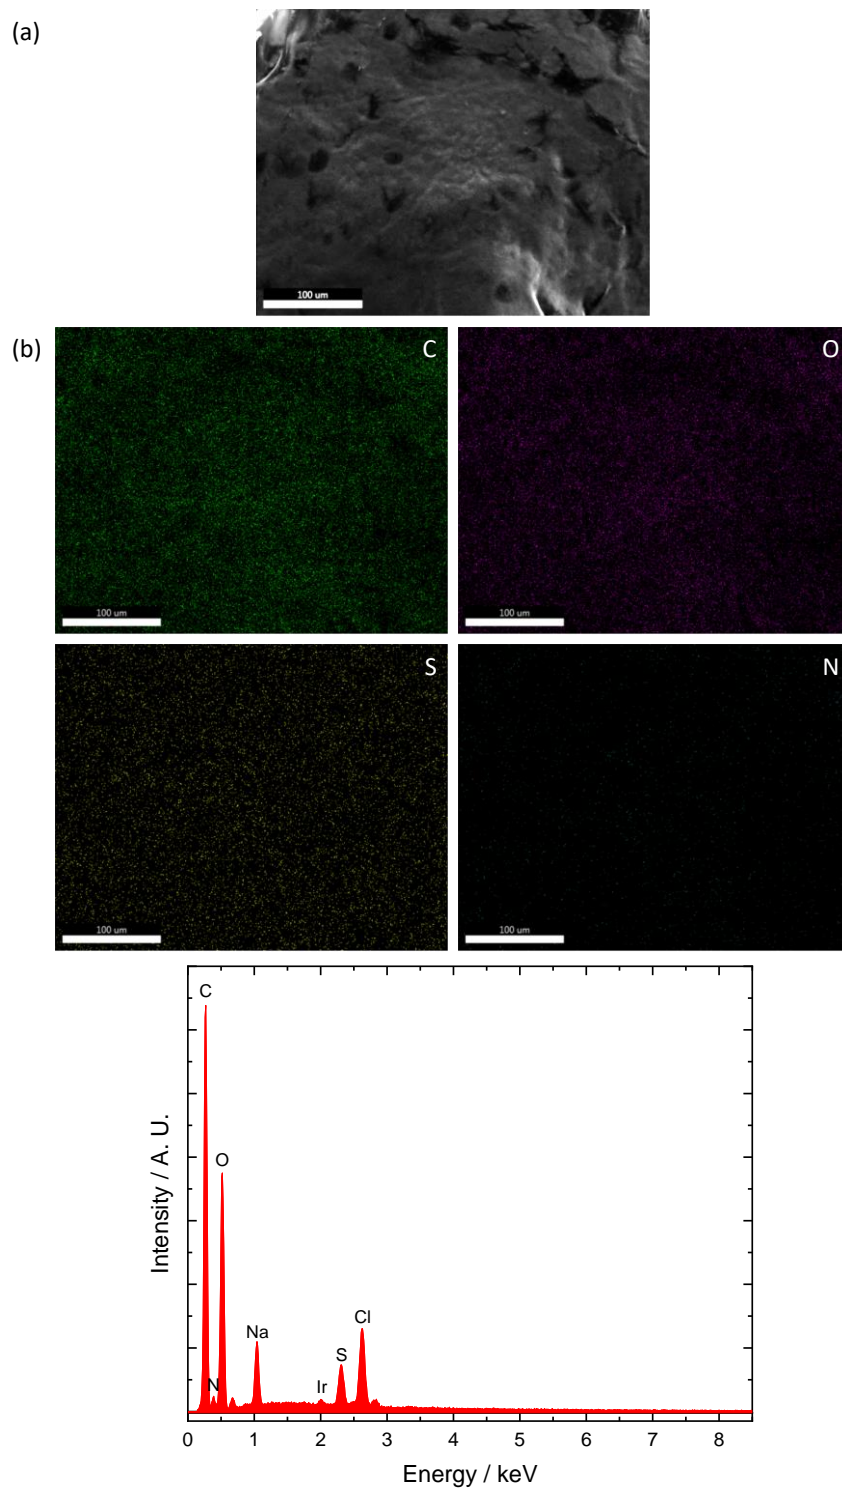

**Fig. S16** Intracellular reactive oxygen species (ROS) levels of **Gel-2** ([Ir] = 80  $\mu$ M, 24 h)-pretreated MDA-MB-231 cells incubated with chloromethyl-2',7'-dichlorodihydrofluorescein diacetate (CM-H<sub>2</sub>DCFDA) (10  $\mu$ M, 30 min;  $\lambda_{\text{ex}}$  = 488 nm,  $\lambda_{\text{em}}$  = 500 – 550 nm) without (left) or with (right) photoirradiation at 450 nm (15 mW cm<sup>-2</sup>) for 30 min. Scale bar = 100  $\mu$ m.

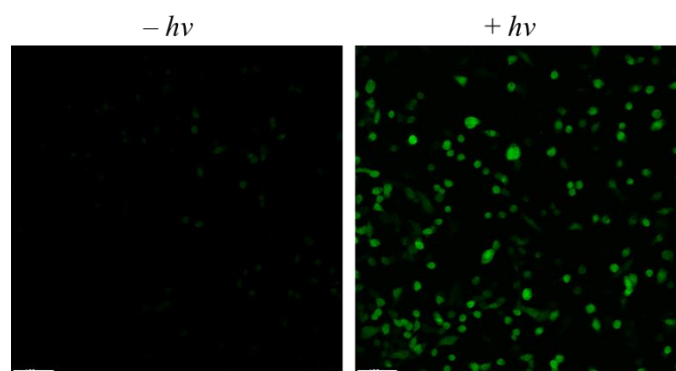

Fig. S17  $^1\text{H}$  NMR spectrum of the ligand bpy-CBT in  $(\text{CD}_3)_2\text{SO}$  at 298 K.

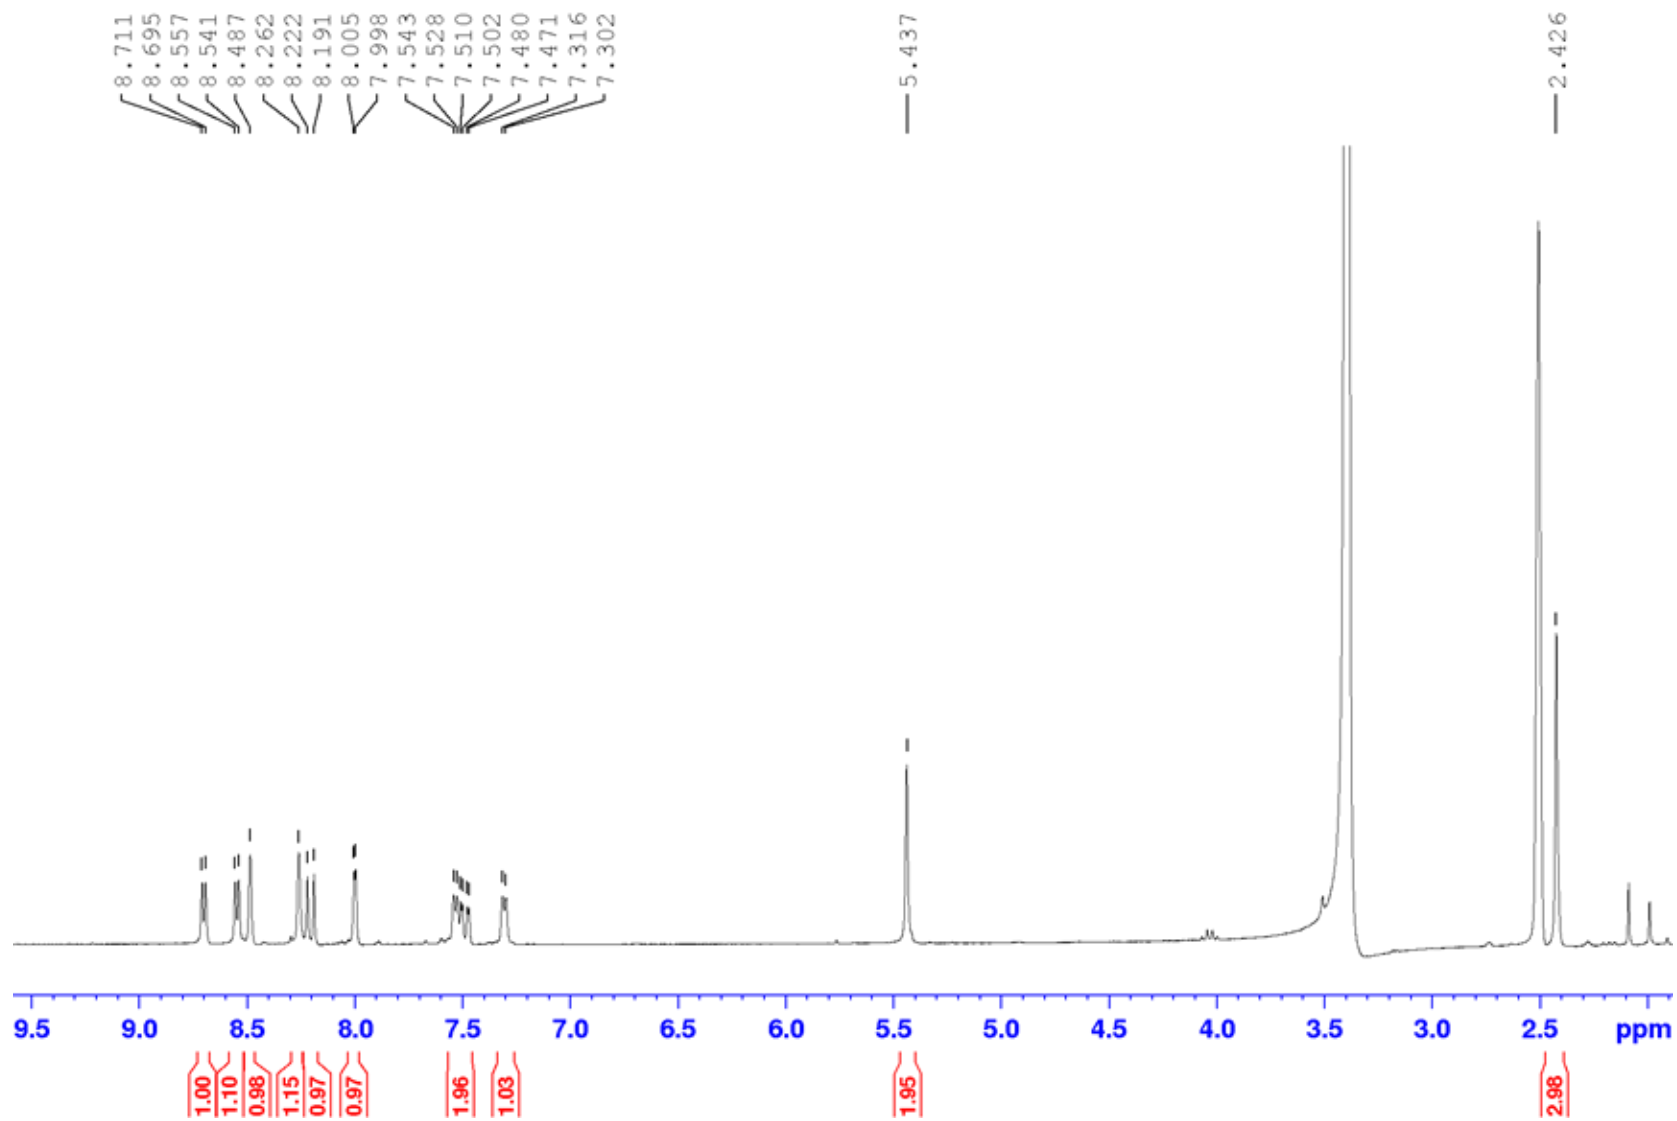

Fig. S18  $^1\text{H}$  NMR spectrum of complex 1 in  $(\text{CD}_3)_2\text{CO}$  at 298 K.

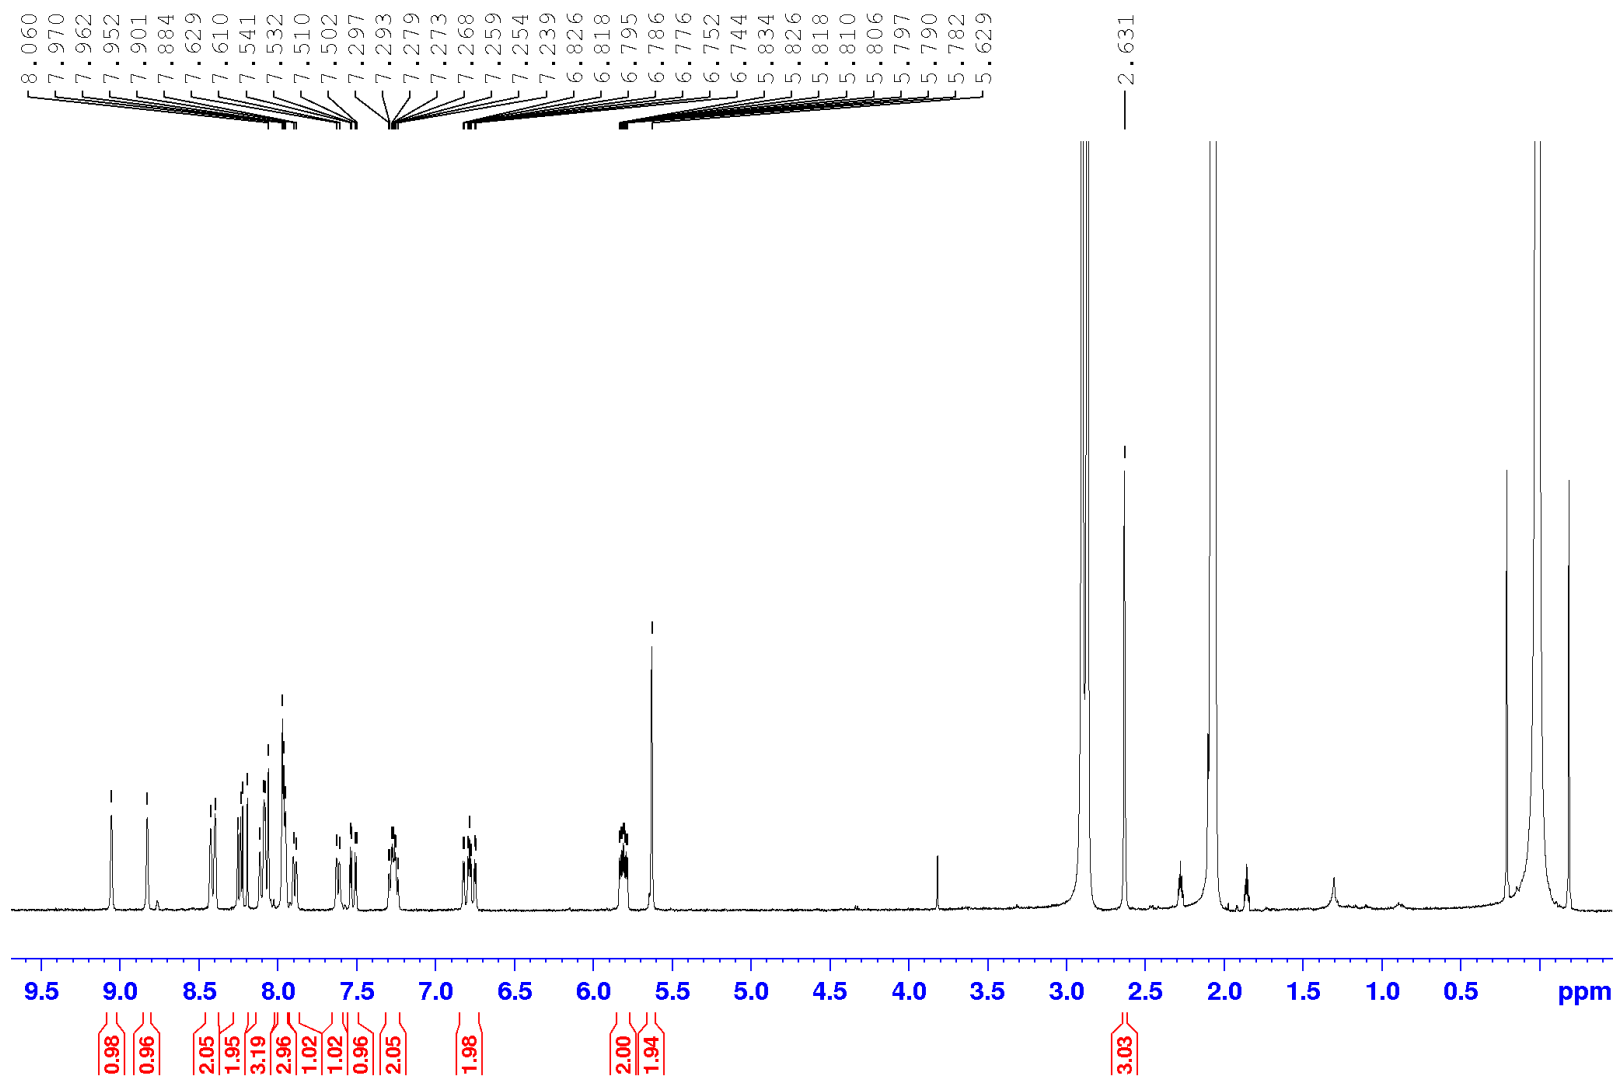

Fig. S19  $^{13}\text{C}$  NMR spectrum of complex **1** in  $(\text{CD}_3)_2\text{SO}$  at 298 K.

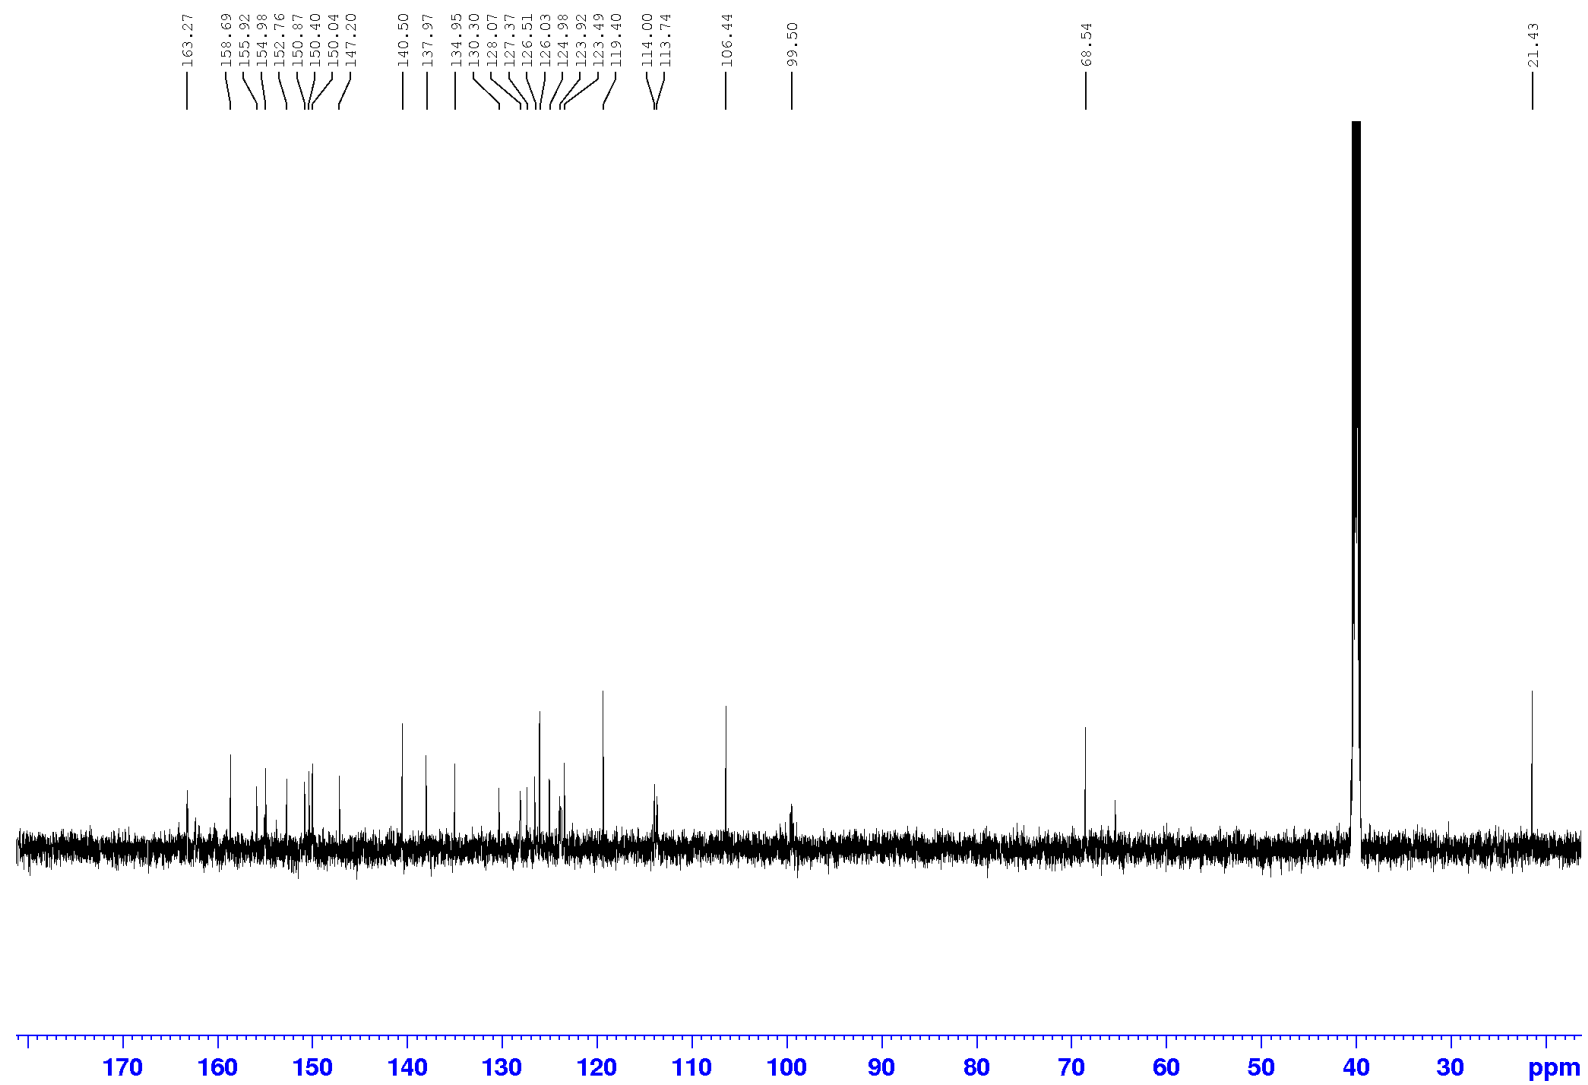

**Fig. S20** HR-ESI mass spectrum of complex **1** in CH<sub>3</sub>OH at 298 K.

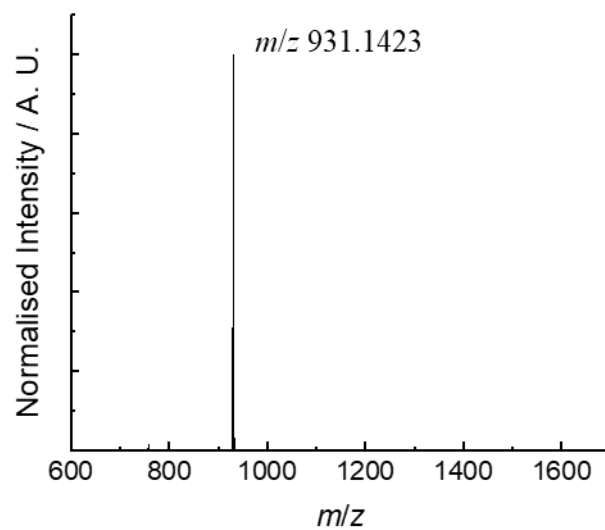

Fig. S21  $^1\text{H}$  NMR spectrum of complex **2** in  $(\text{CD}_3)_2\text{CO}$  at 298 K.

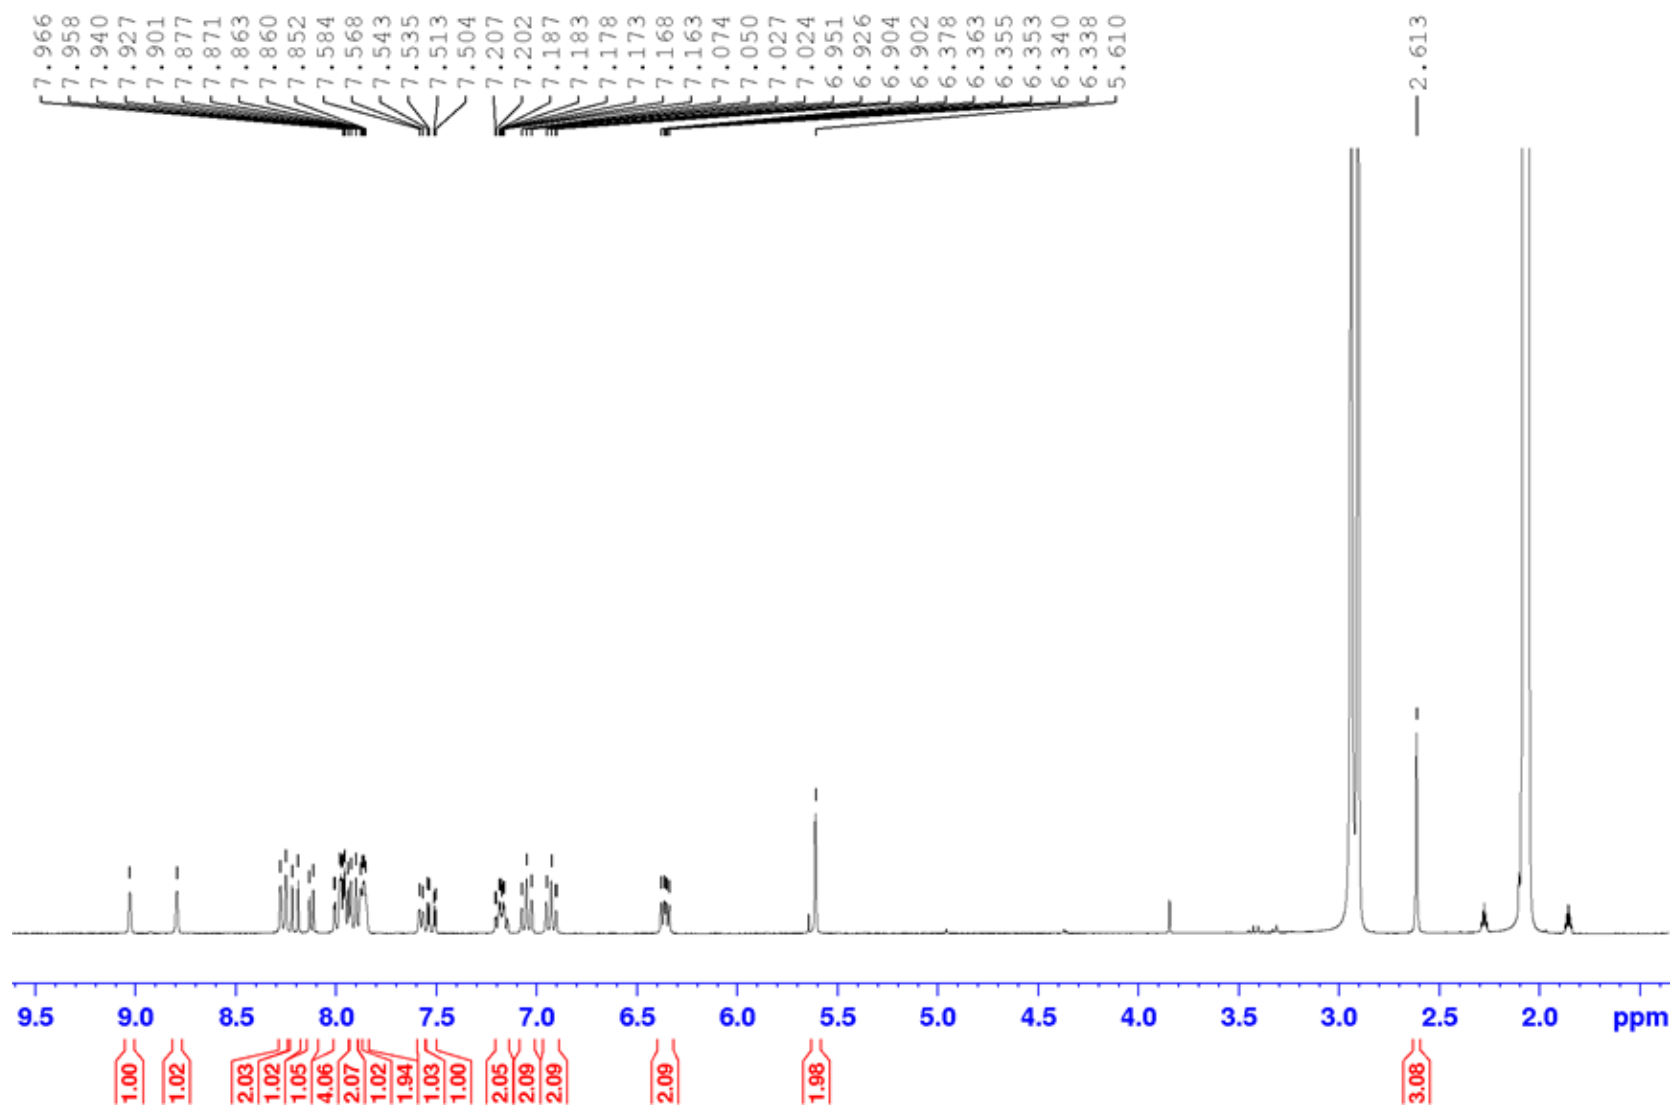



Fig. S22  $^{13}\text{C}$  NMR spectrum of complex **2** in  $(\text{CD}_3)_2\text{SO}$  at 298 K.

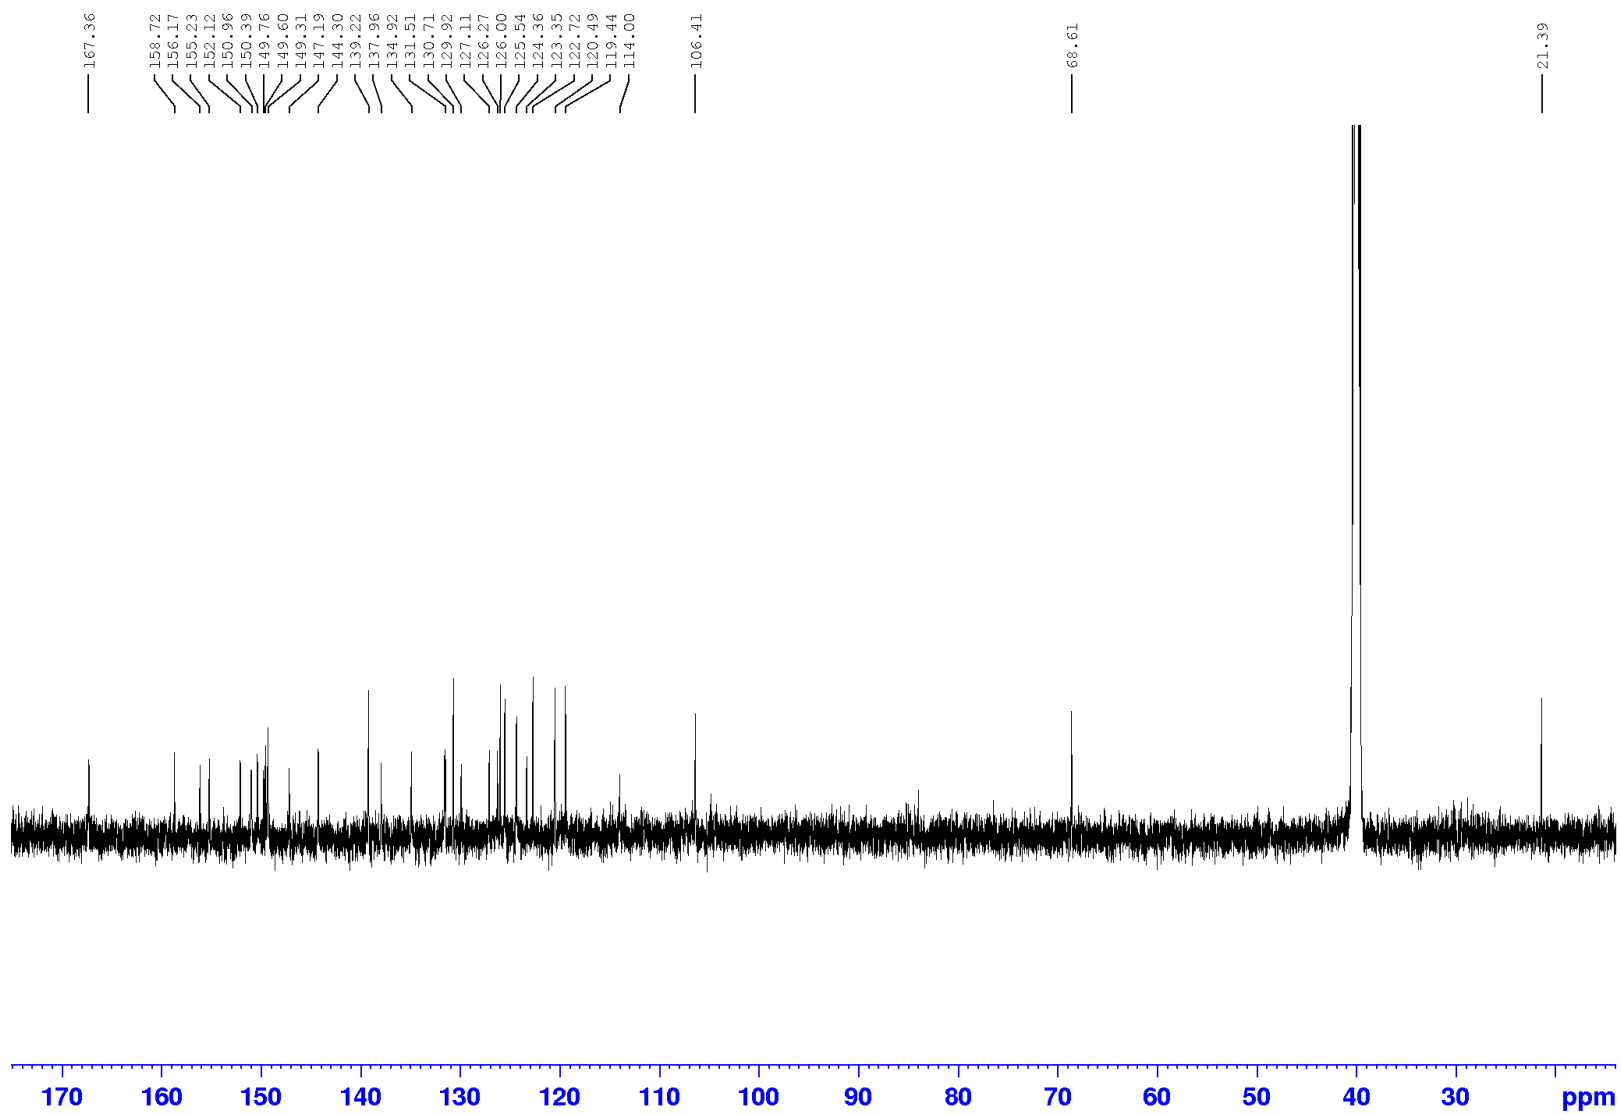

**Fig. S23** HR-ESI mass spectrum of complex **2** in CH<sub>3</sub>OH at 298 K.

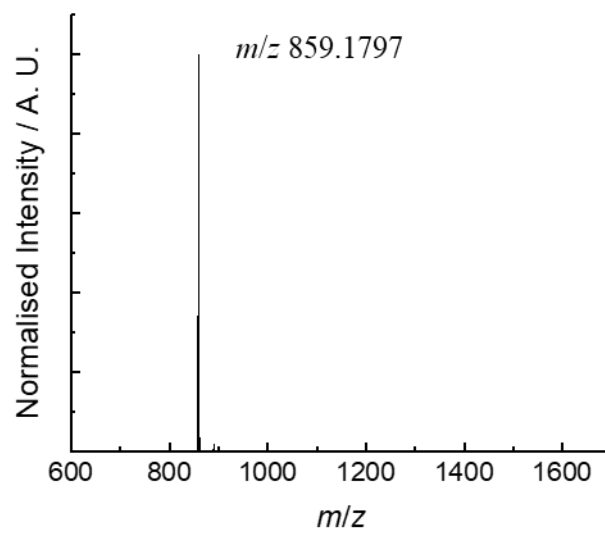

Fig. S24  $^1\text{H}$  NMR spectrum of complex **3** in  $(\text{CD}_3)_2\text{CO}$  at 298 K.

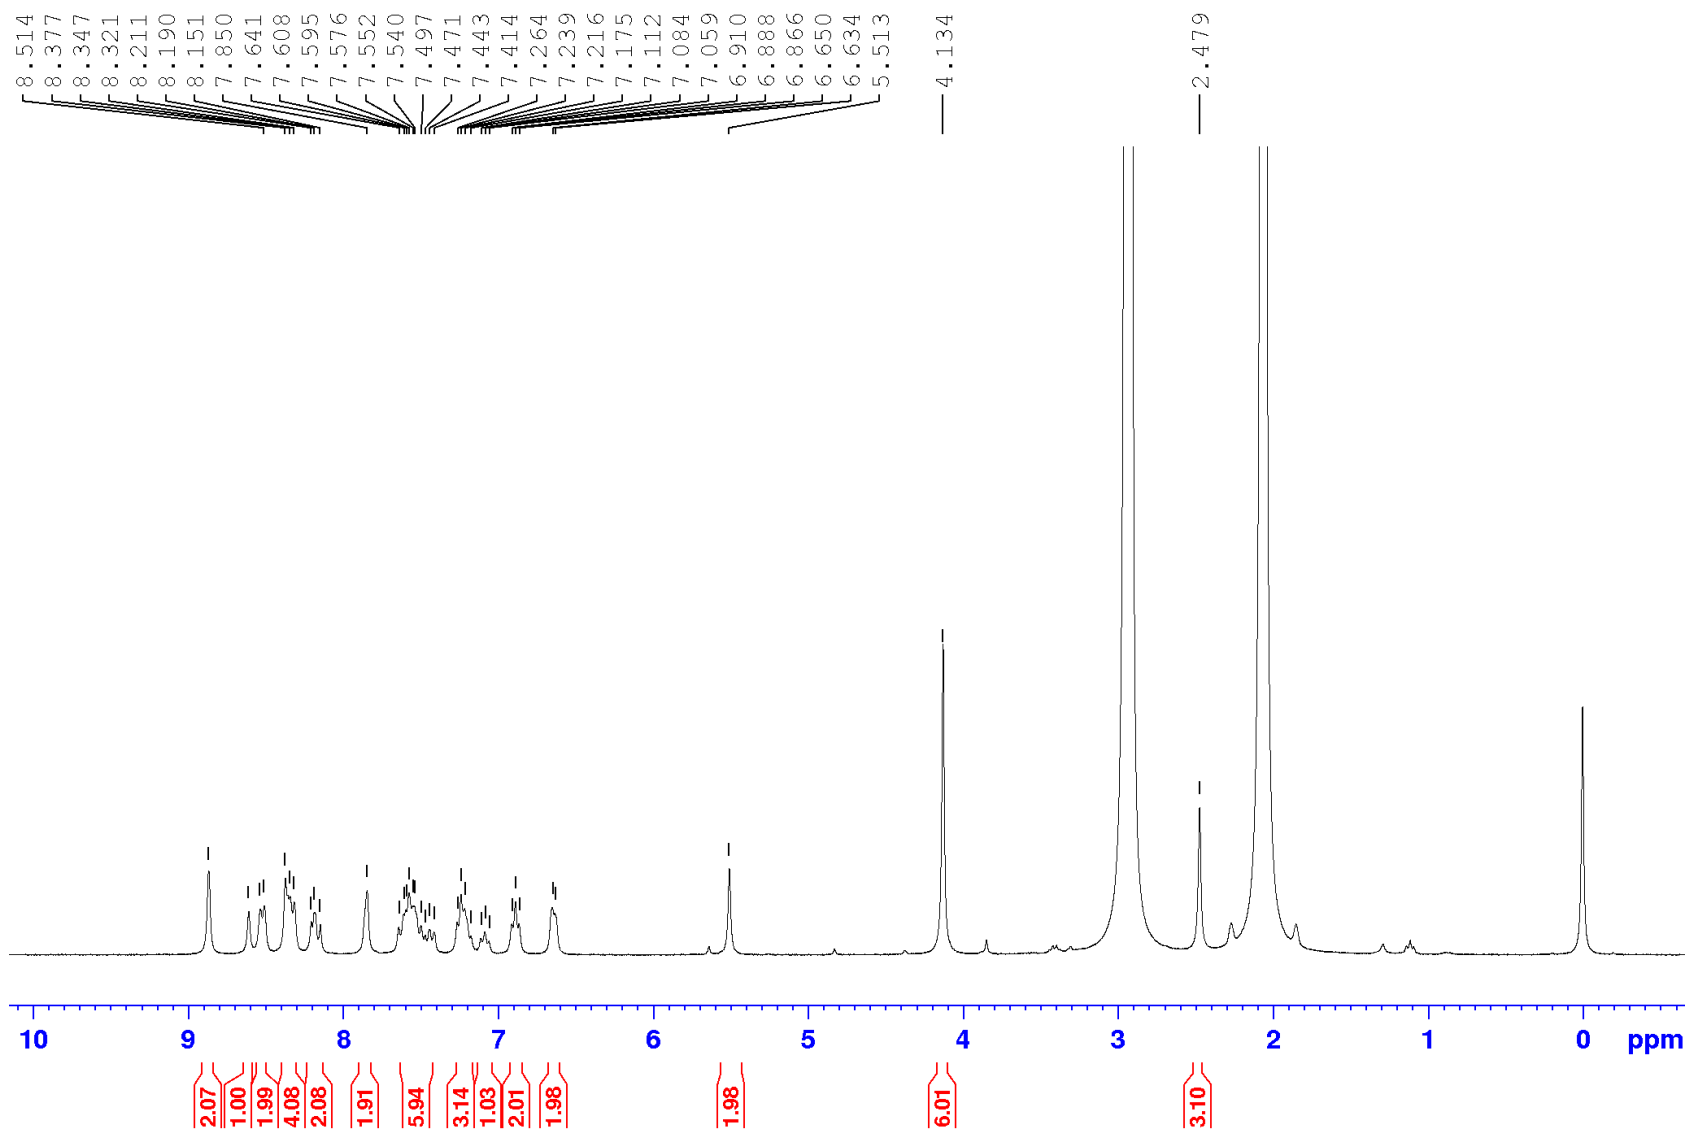

Fig. S25  $^{13}\text{C}$  NMR spectrum of complex **3** in  $(\text{CD}_3)_2\text{SO}$  at 298 K.

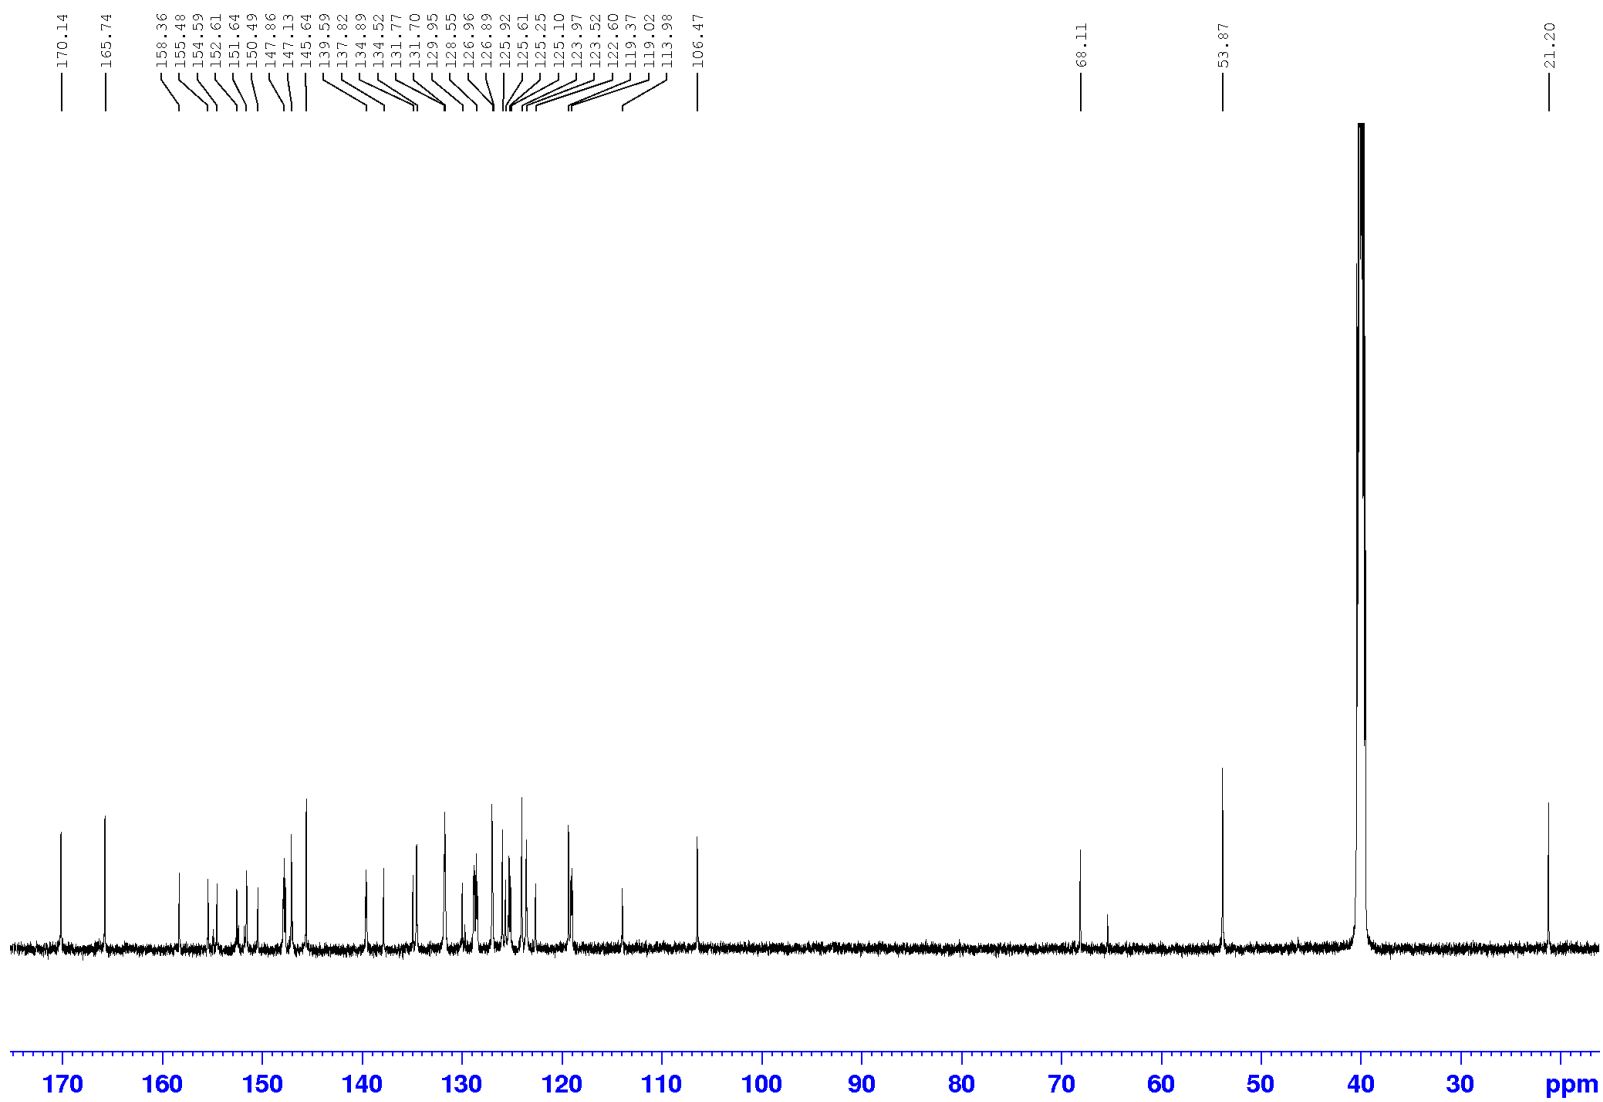

**Fig. S26** HR-ESI mass spectrum of complex **3** in CH<sub>3</sub>OH at 298 K.

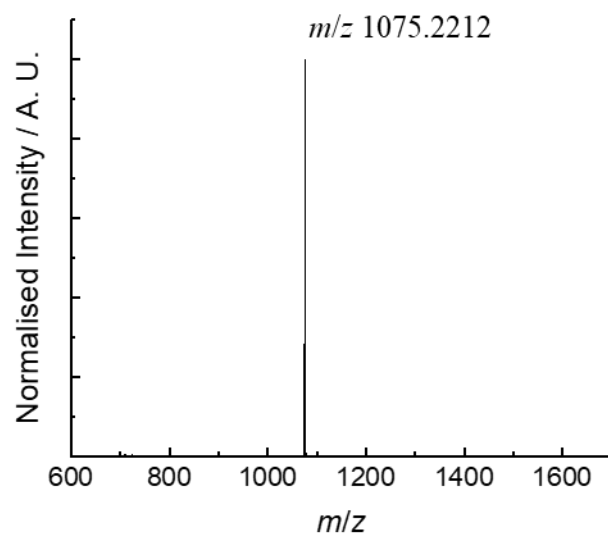

## Reference

1. K. Suzuki, A. Kobayashi, S. Kaneko, K. Takehira, T. Yoshihara, H. Ishida, Y. Shiina, S. Oishi and S. Tobita, *Phys. Chem. Chem. Phys.*, 2009, **11**, 9850–9860.
